# Supplementary figures and images for: eIF4E S209 phosphorylation licenses myc- and stress-driven oncogenesis
Source: eLife journal article supplement (doi:10.7554/elife.60151), 2020-11-02

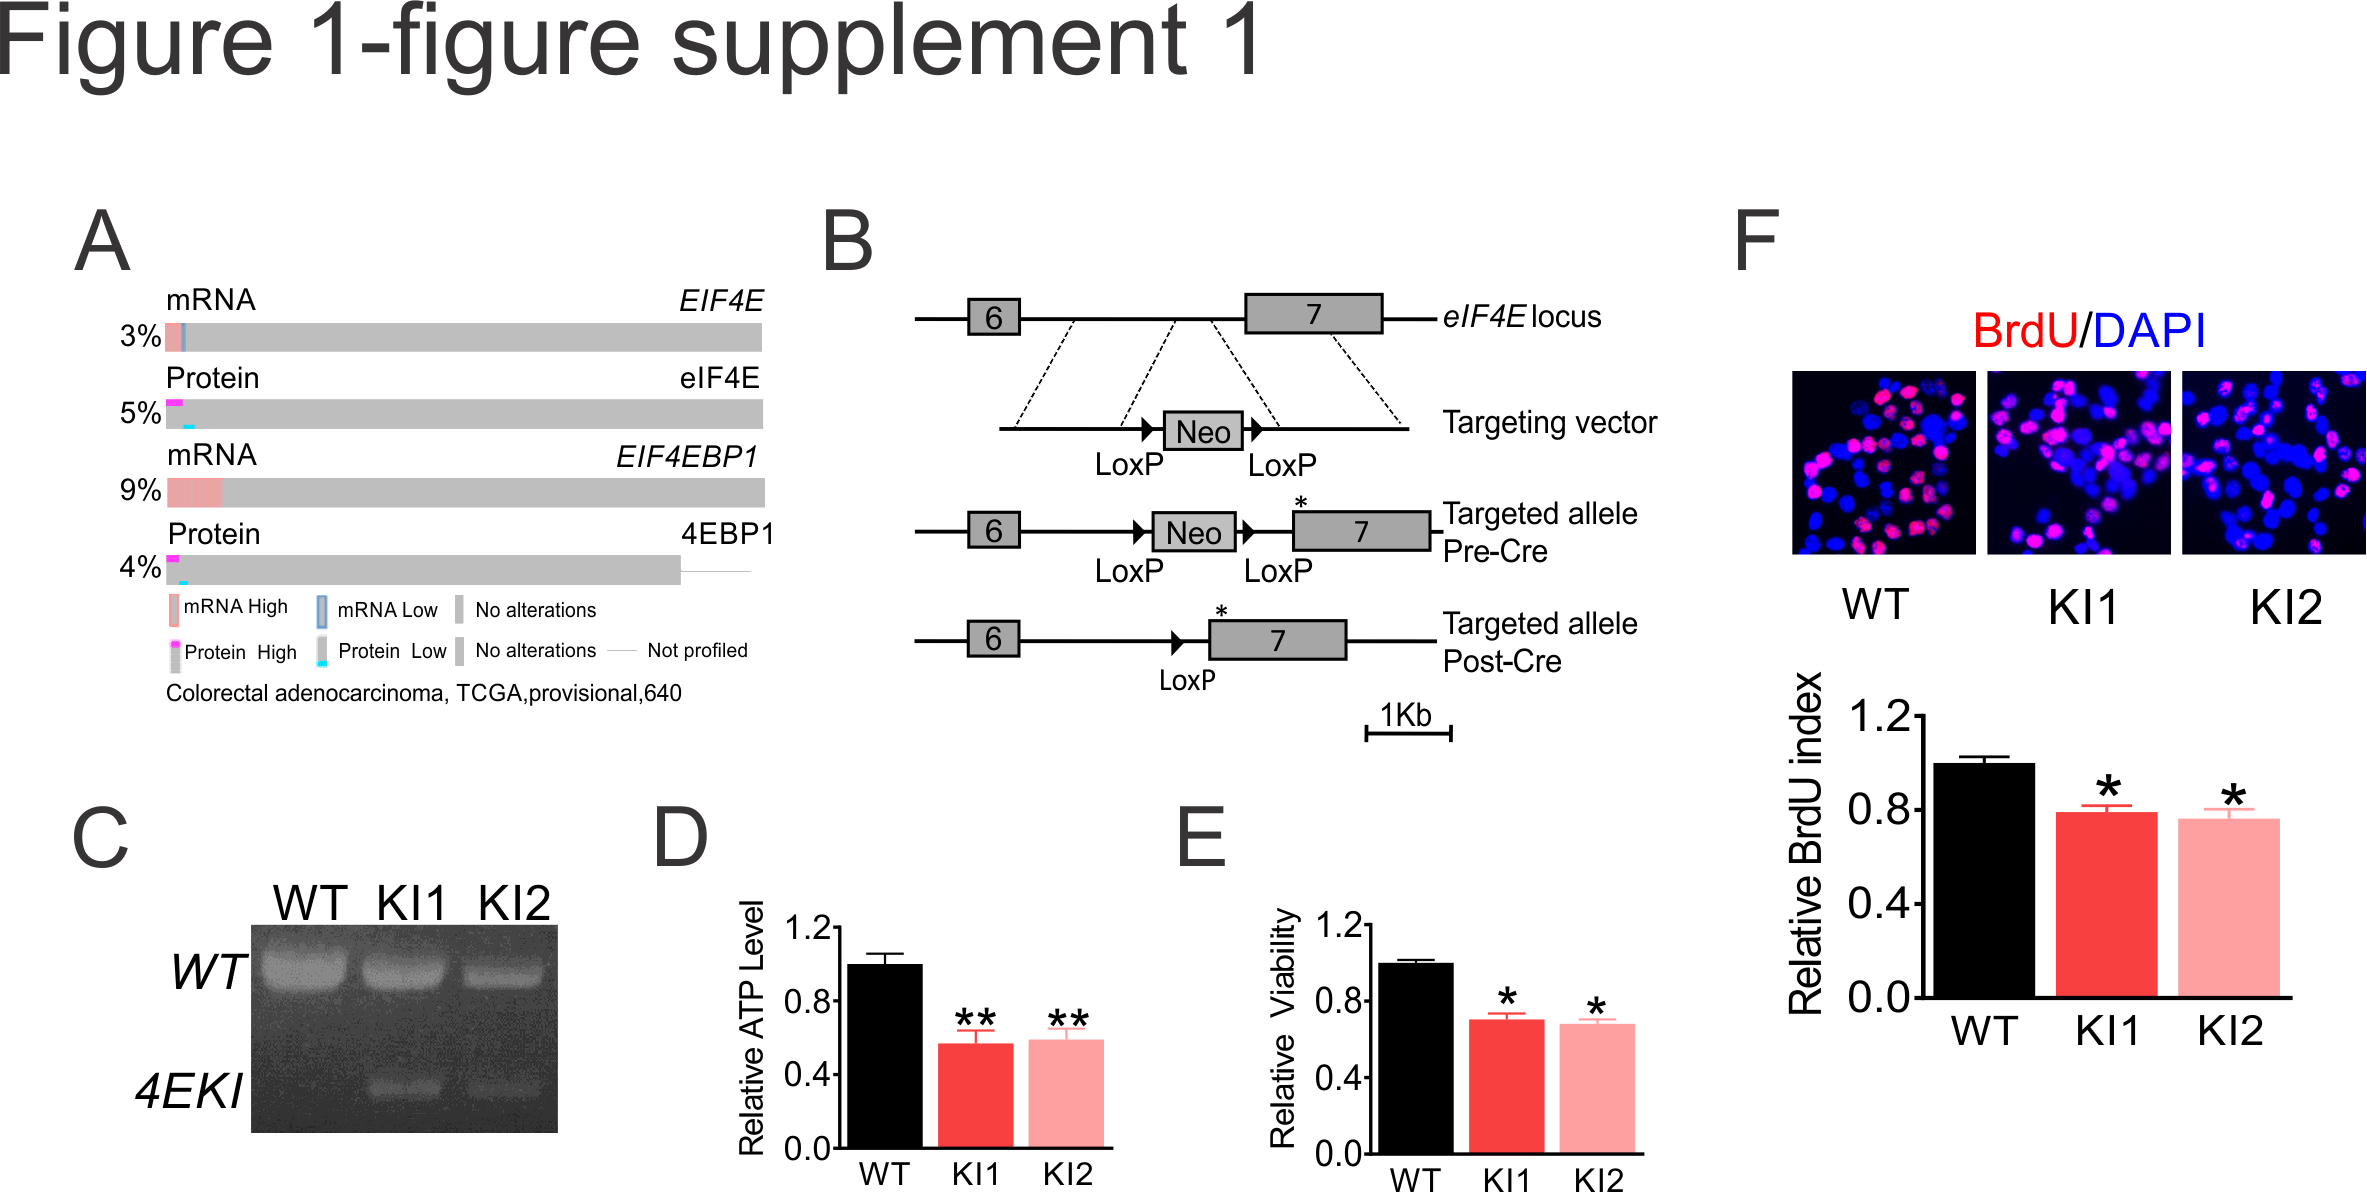

Supplement: supp [file elife-60151-supp-v1.zip › elife_poa_e60151_Figure_1_figure_supplement_1.jpg]

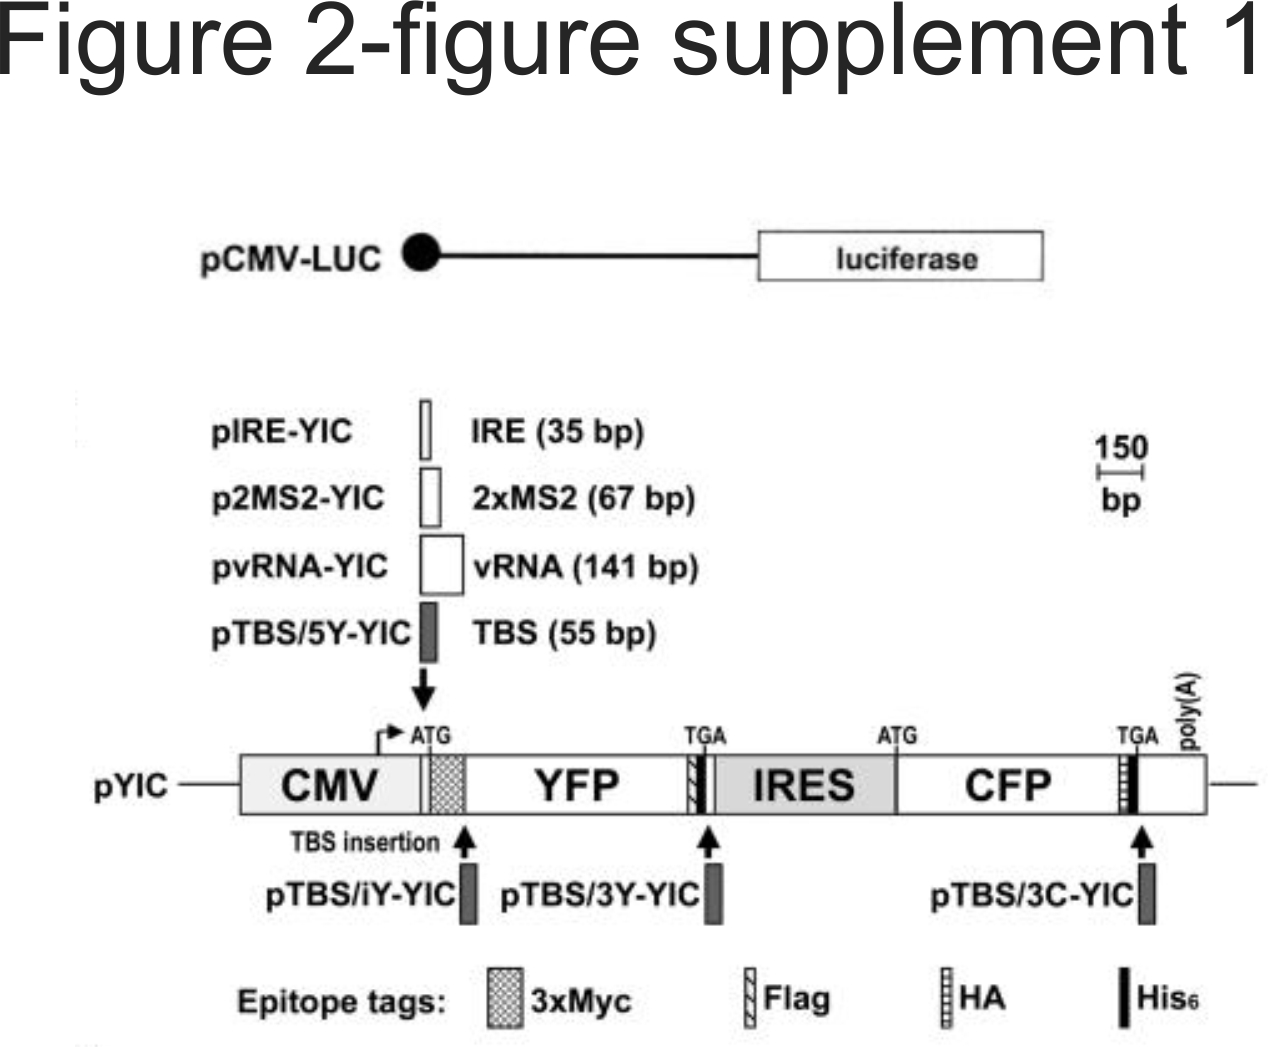

Supplement: supp [file elife-60151-supp-v1.zip › elife_poa_e60151_Figure_2_figure_supplement_1.jpg]

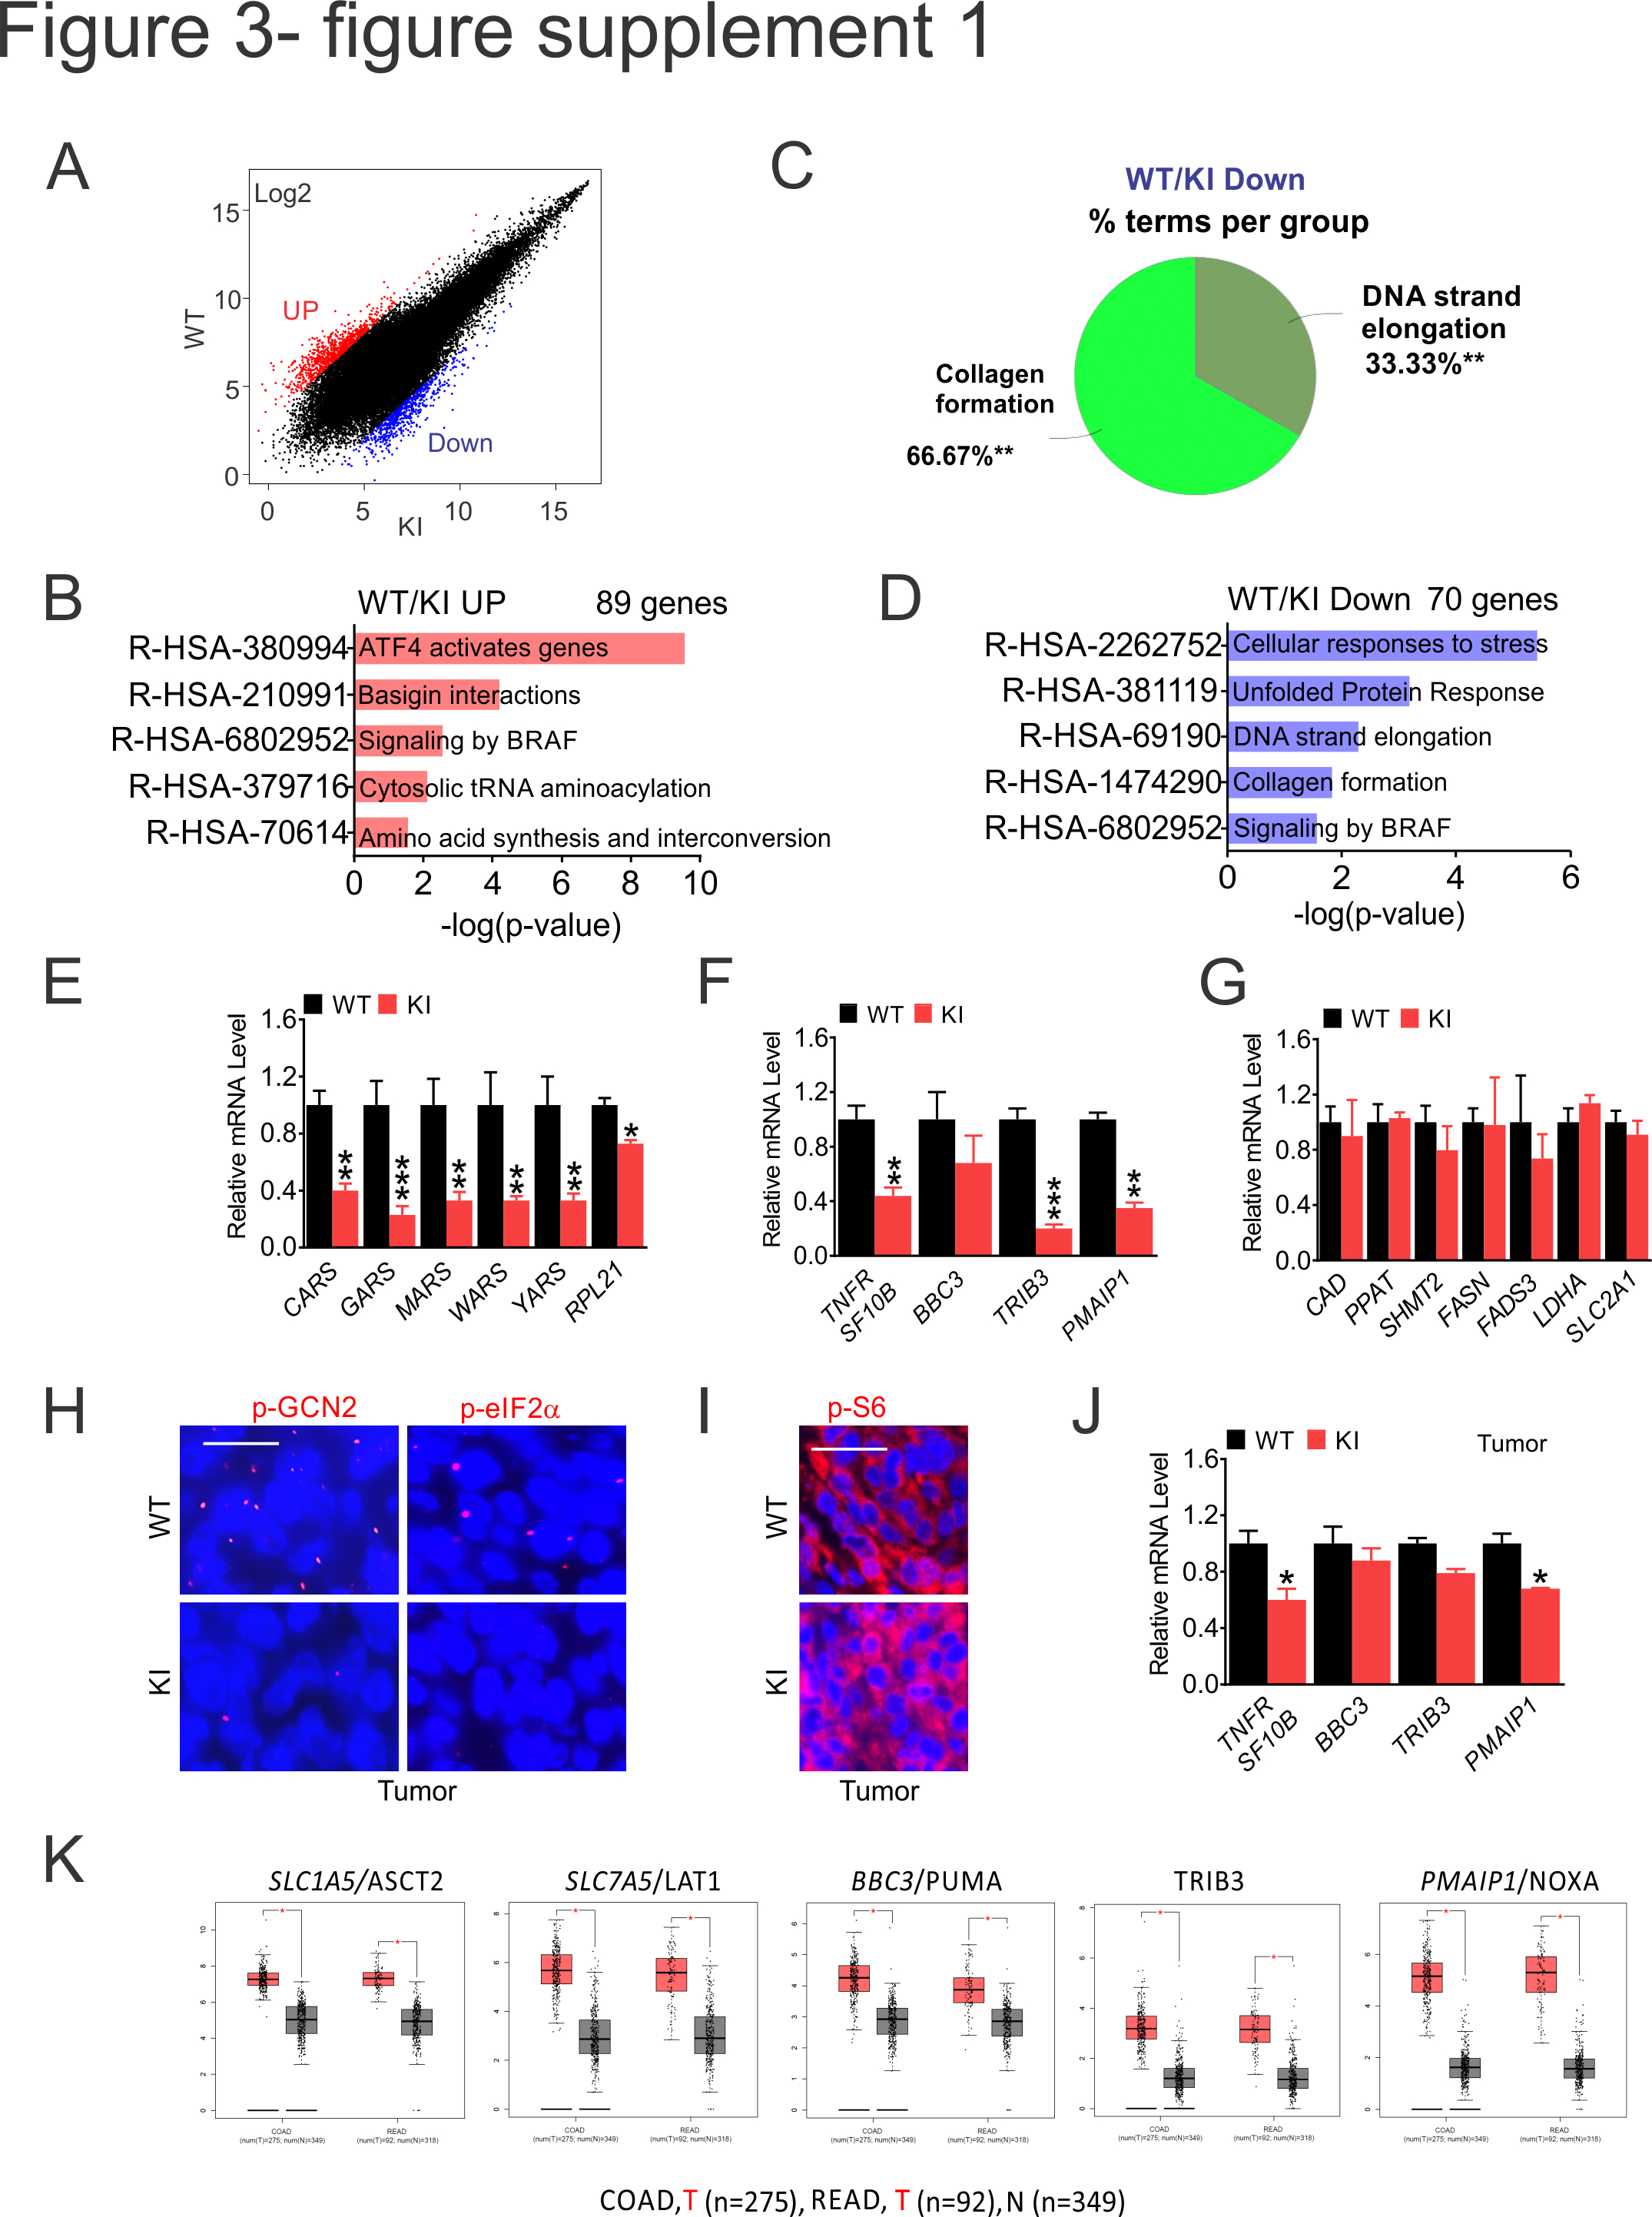

Supplement: supp [file elife-60151-supp-v1.zip › elife_poa_e60151_Figure_3_figure_supplement_1.jpg]

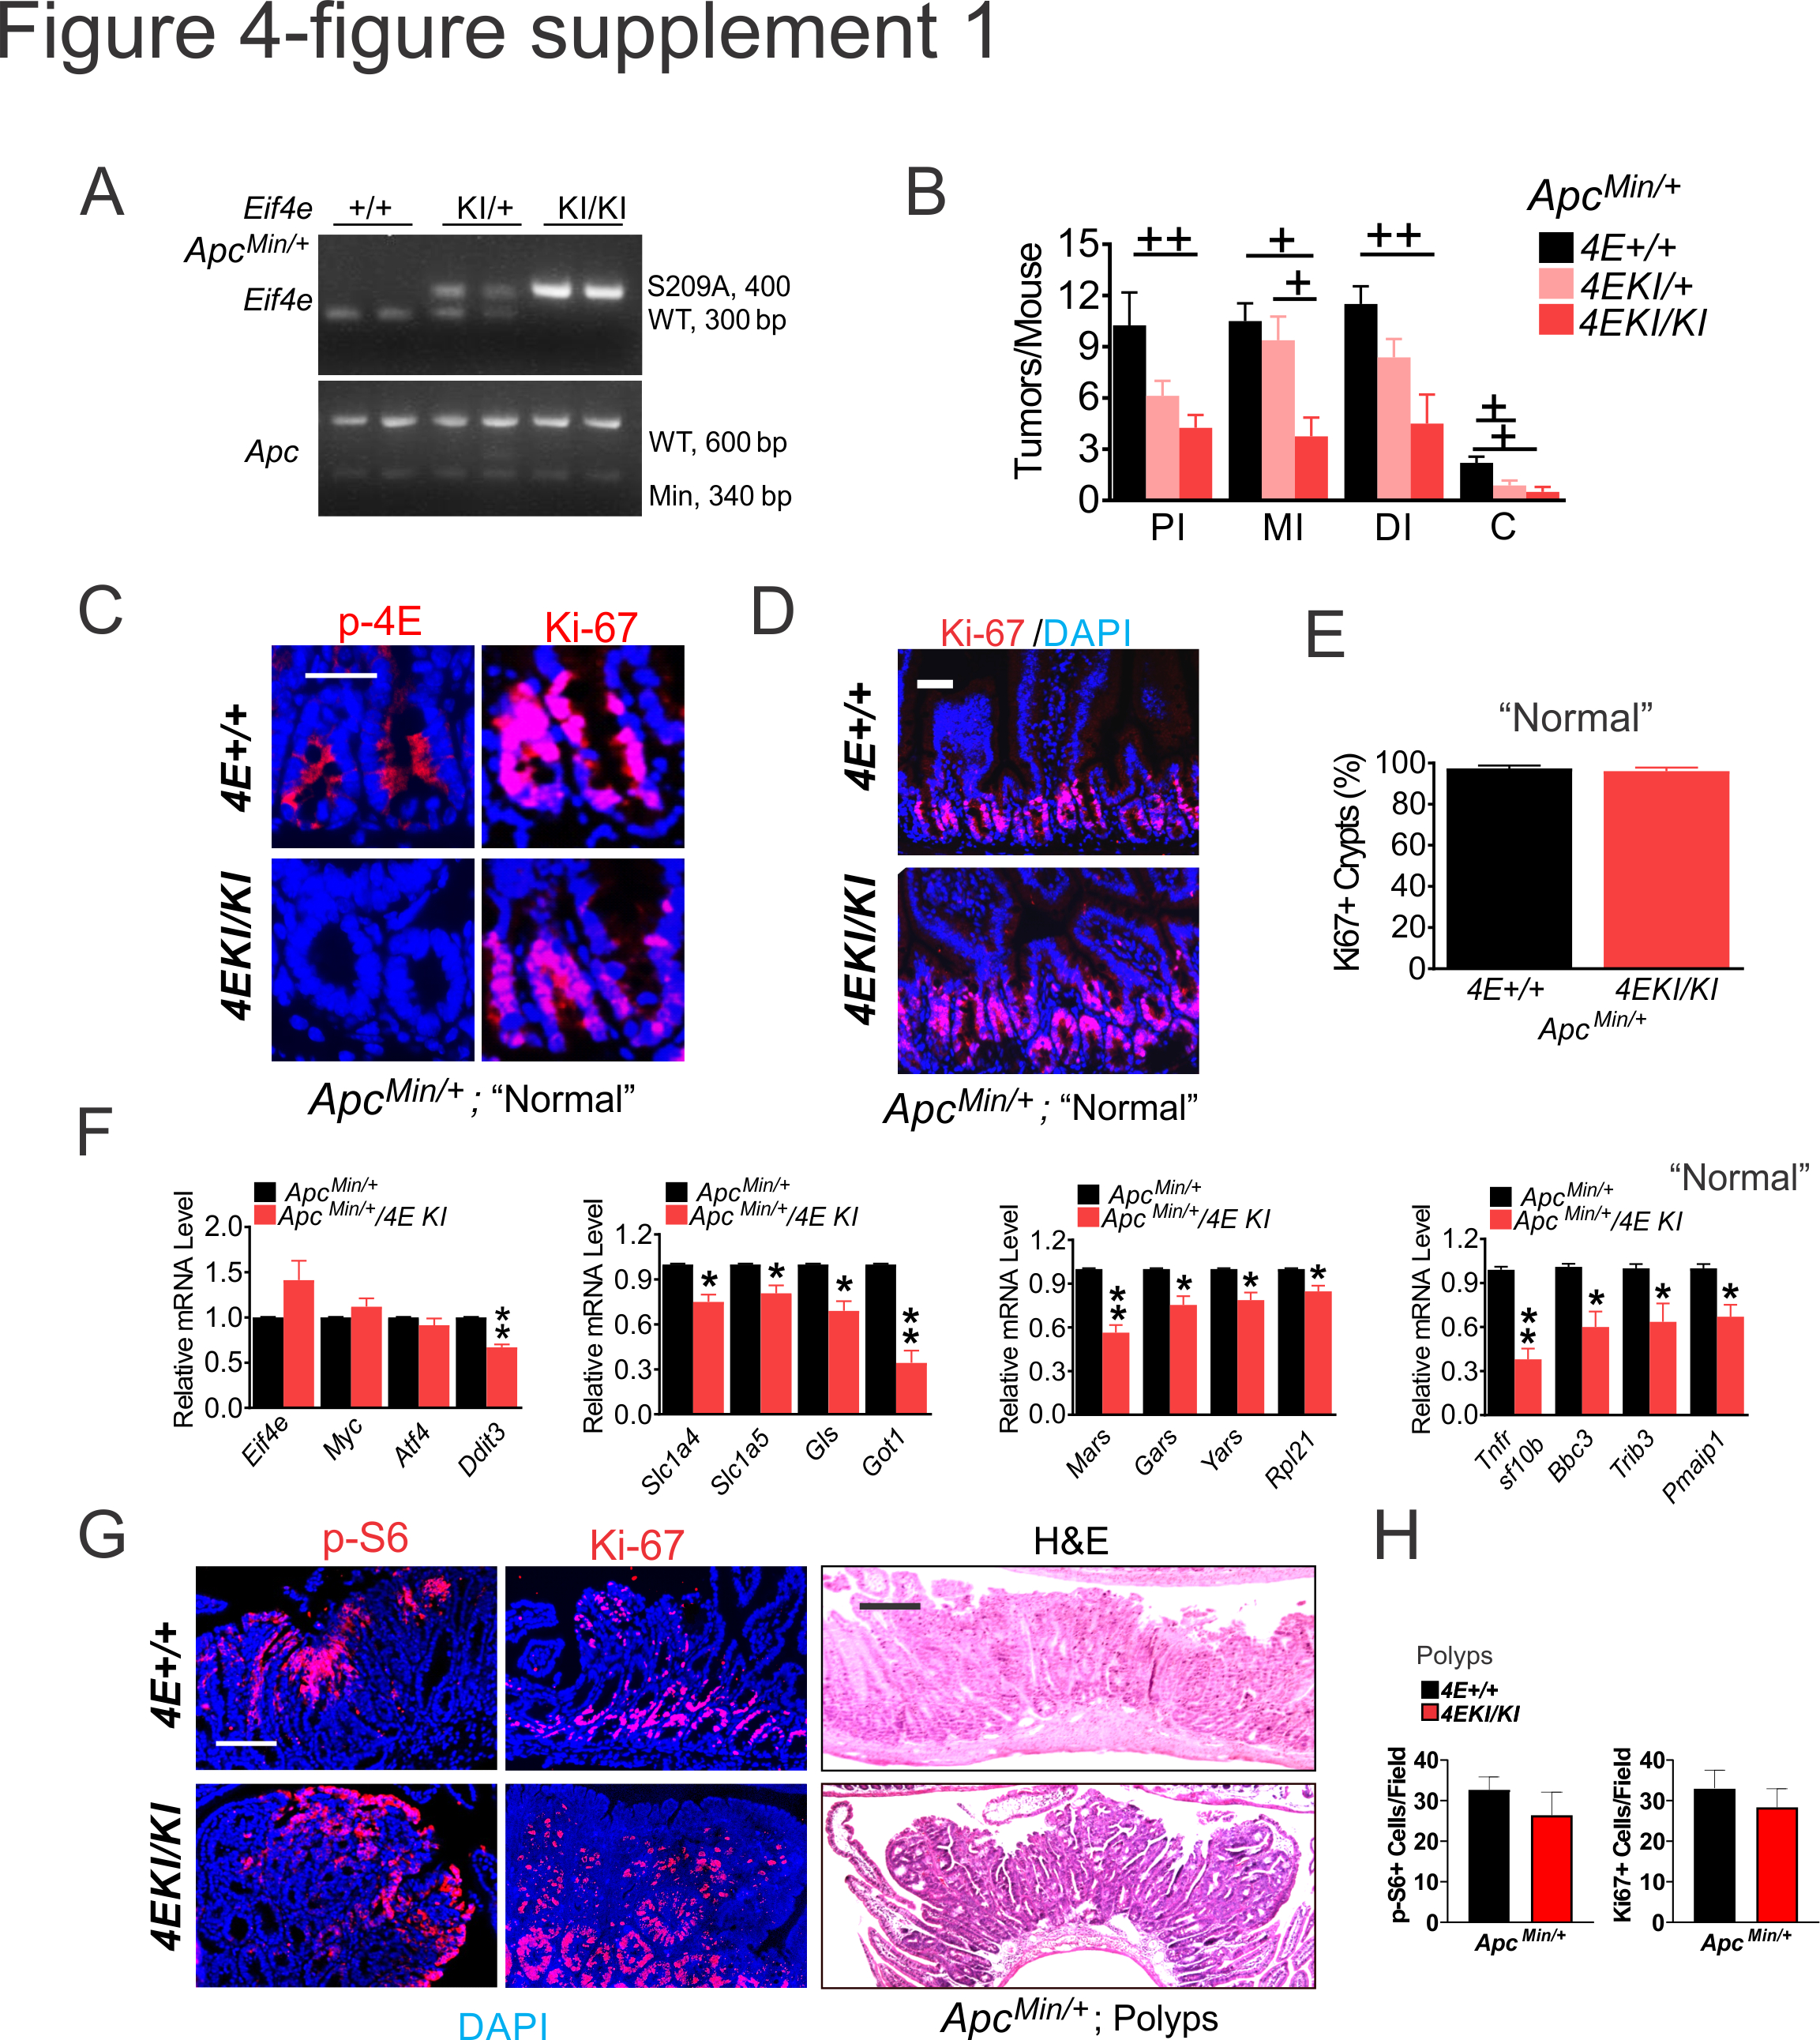

Supplement: supp [file elife-60151-supp-v1.zip › elife_poa_e60151_Figure_4_figure_supplement_1.jpg]

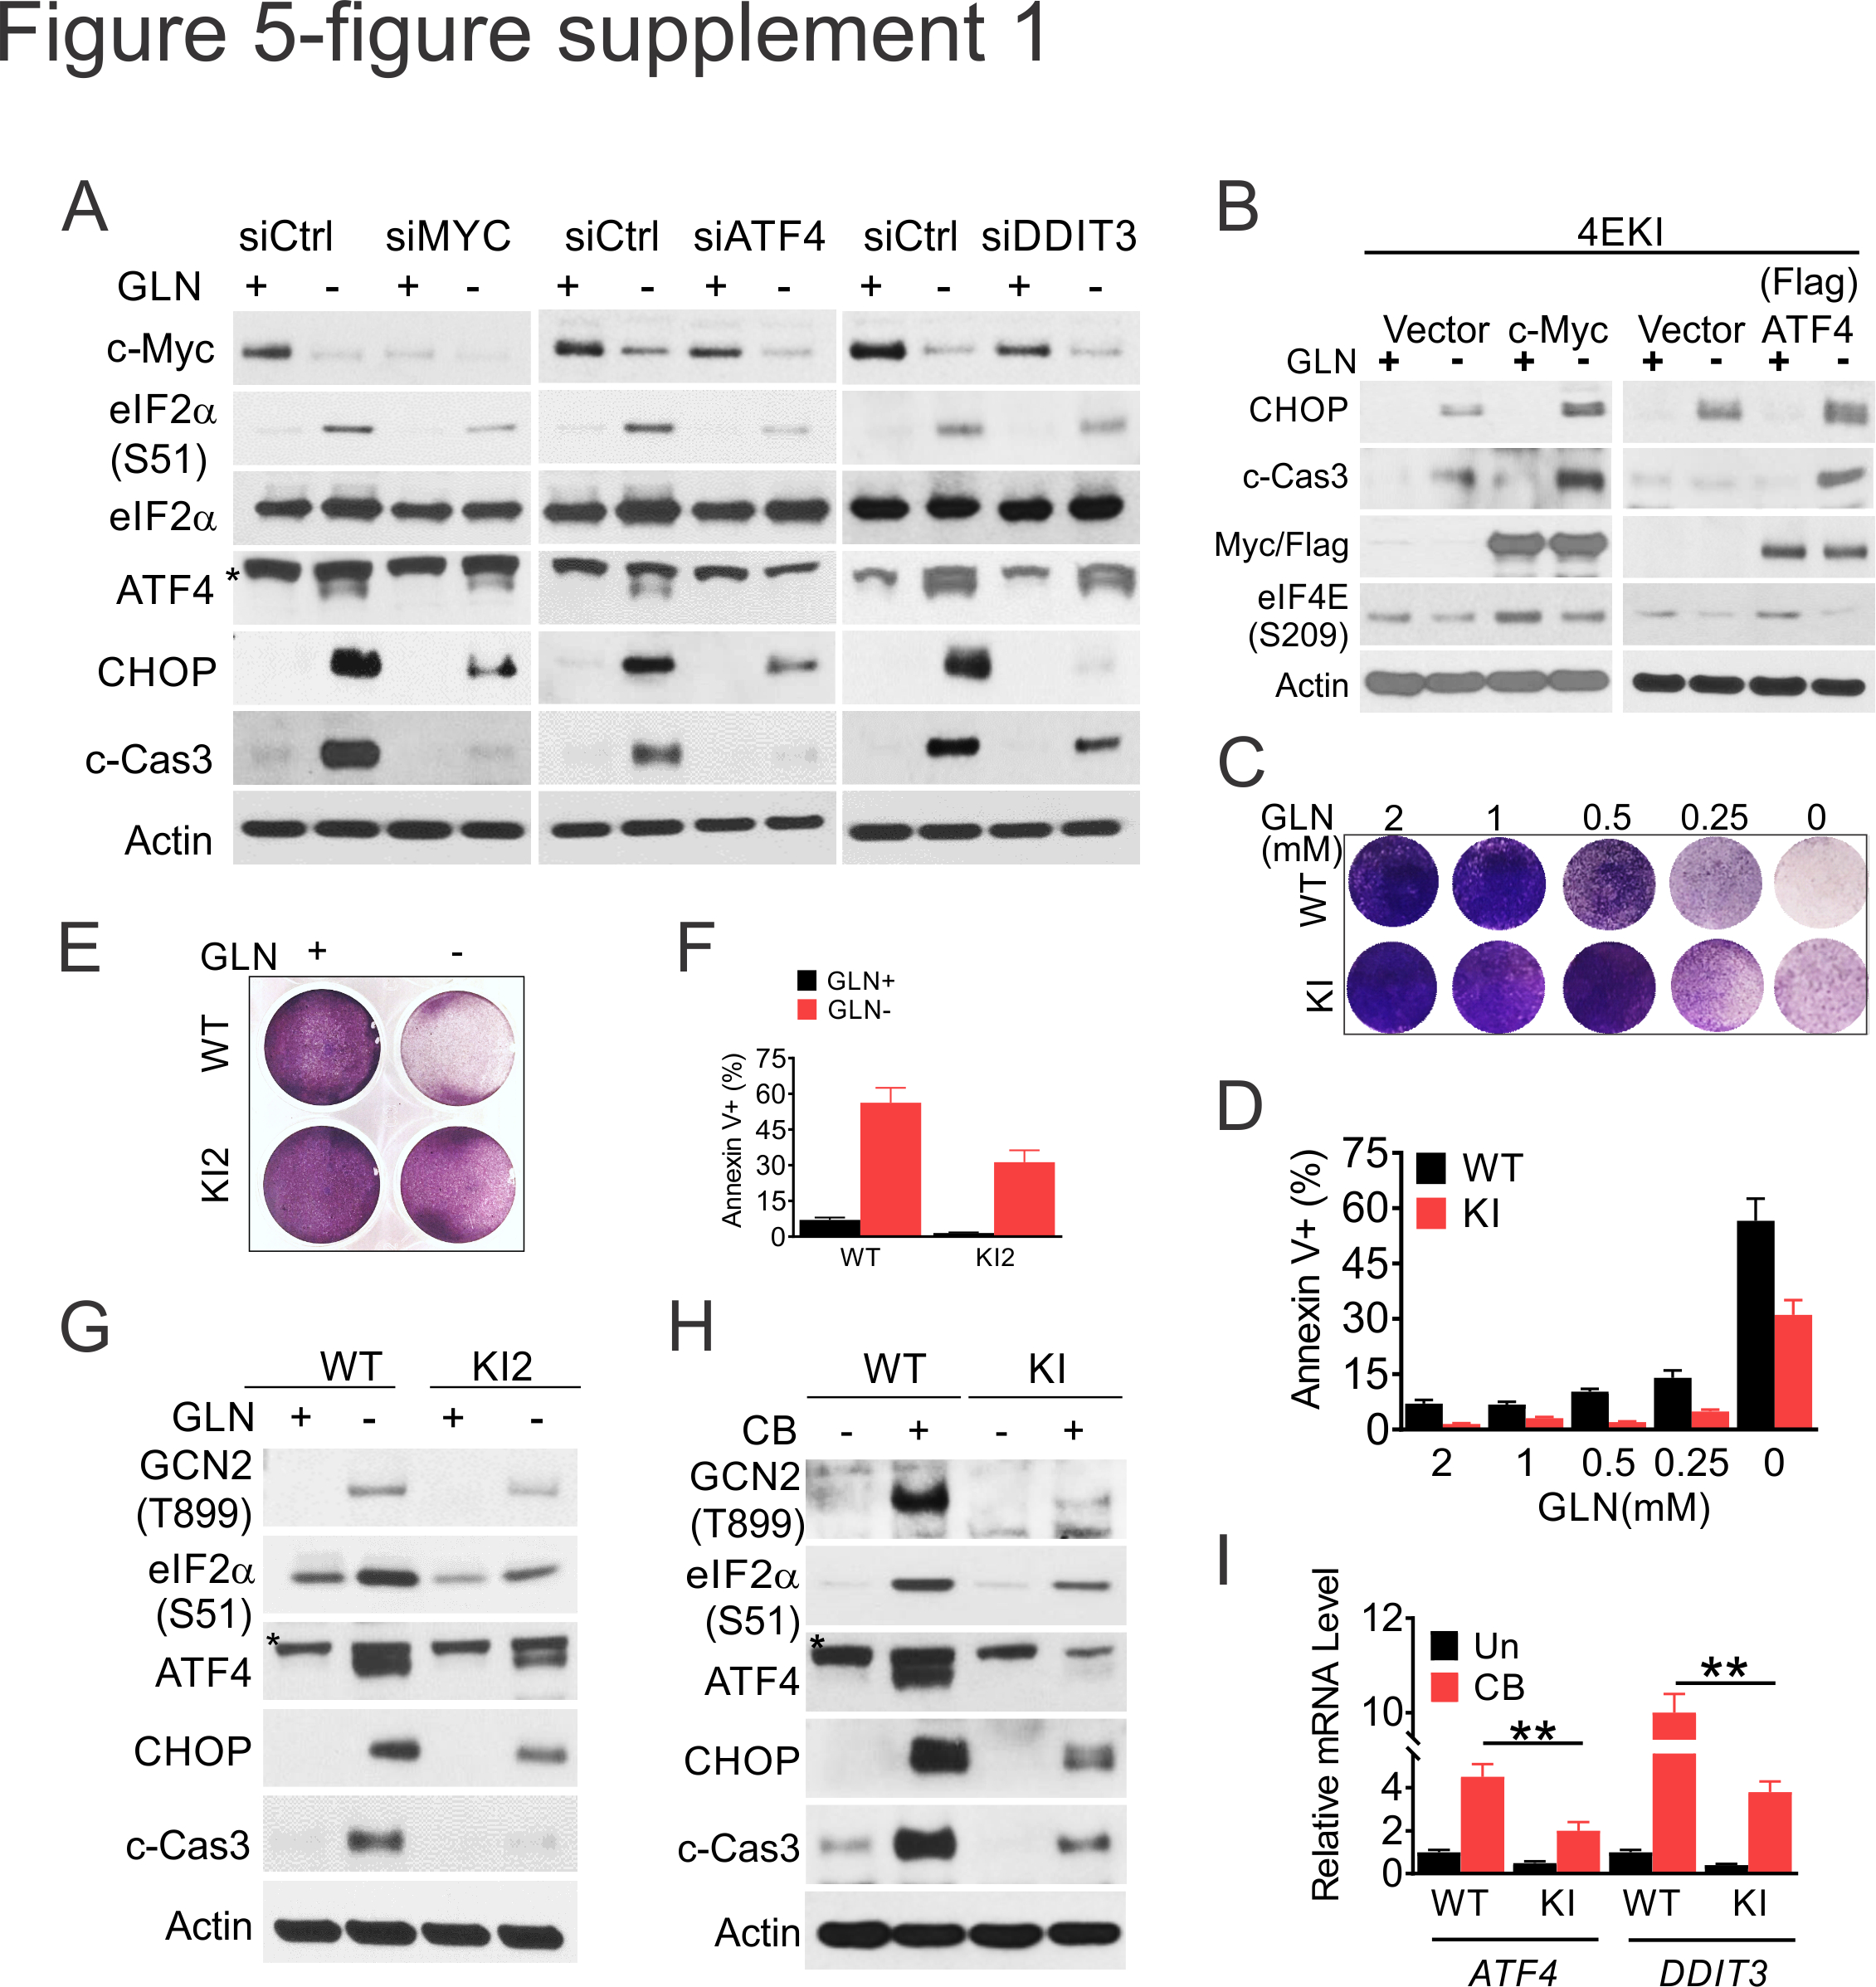

Supplement: supp [file elife-60151-supp-v1.zip › elife_poa_e60151_Figure_5_figure_supplement_1.jpg]

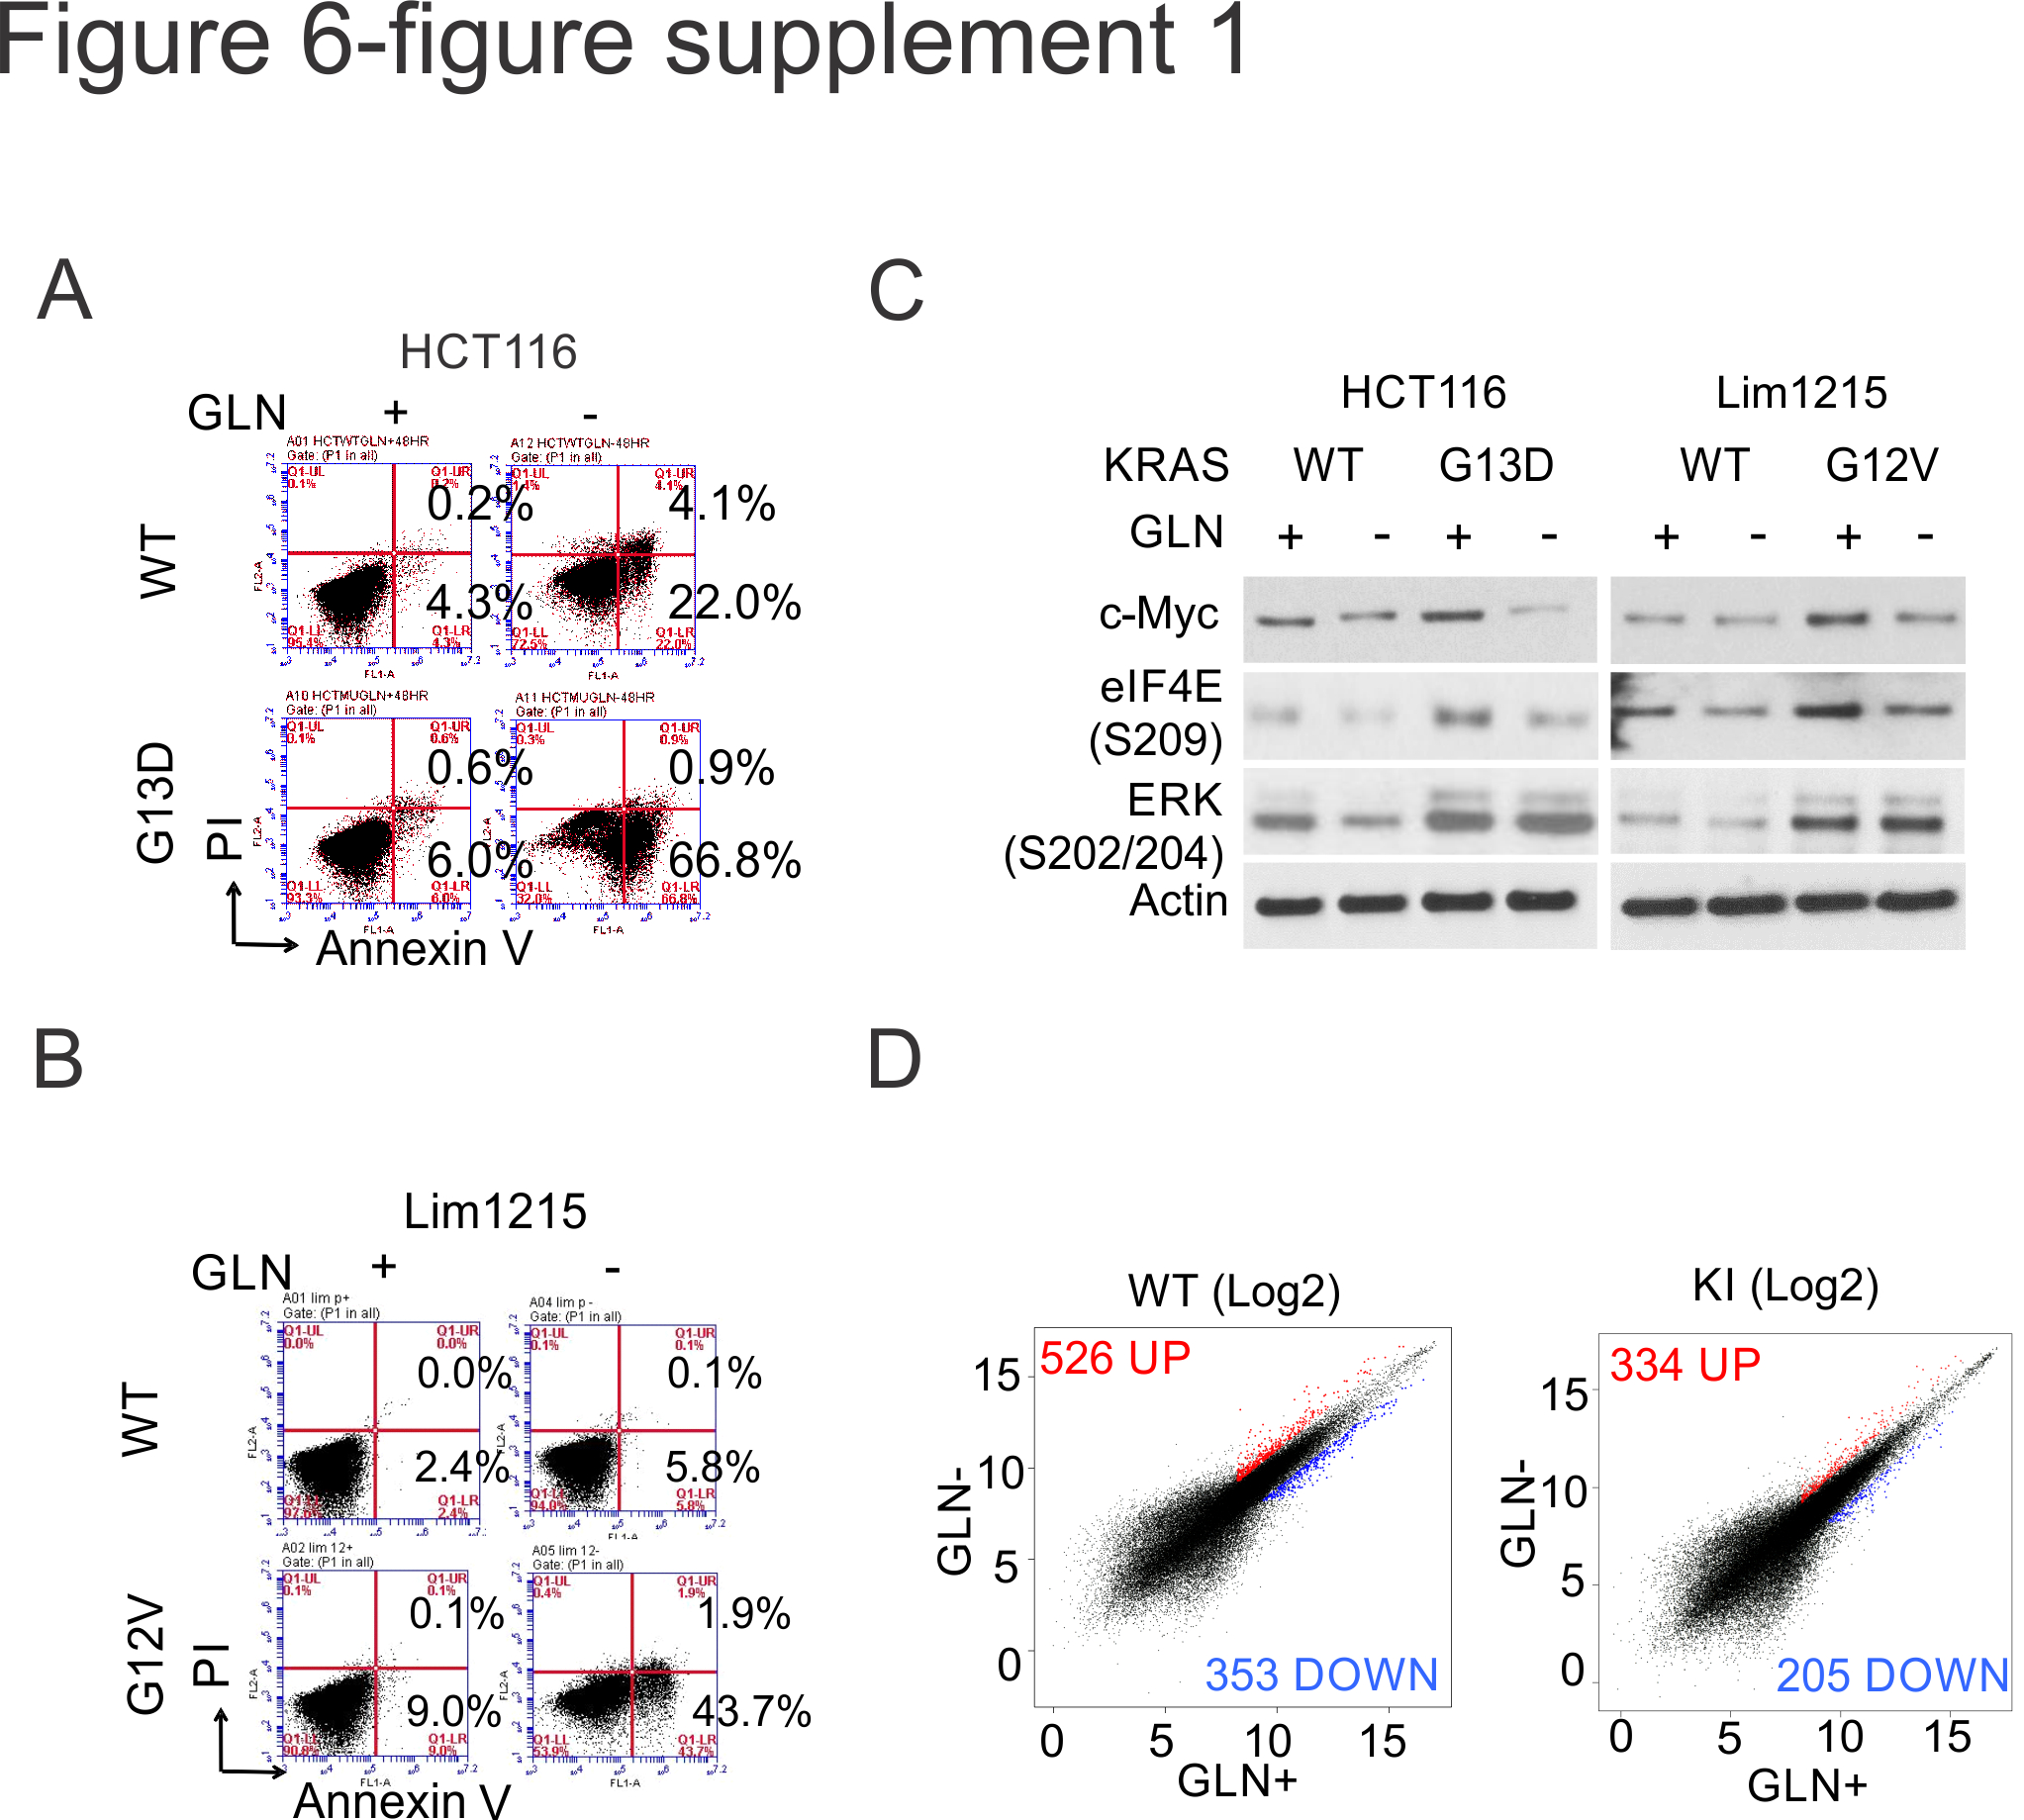

Supplement: supp [file elife-60151-supp-v1.zip › elife_poa_e60151_Figure_6_figure_supplement_1.jpg]

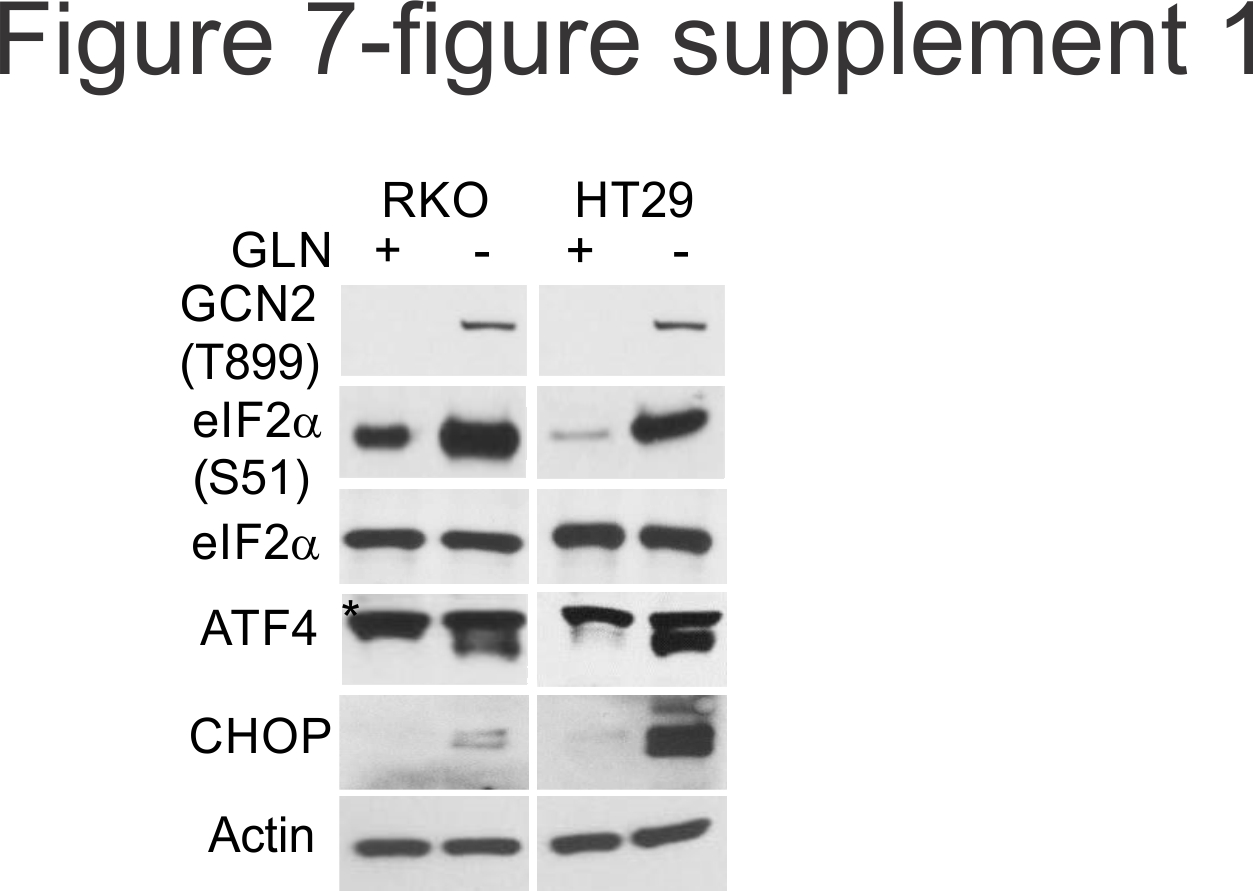

Supplement: supp [file elife-60151-supp-v1.zip › elife_poa_e60151_Figure_7_figure_supplement_1.jpg]
